# Supplementary material for: Inter-Species Differences in Regulation of the Progranulin–Sortilin Axis in TDP-43 Cell Models of Neurodegeneration
Source: Int J Mol Sci. 2019 Nov 22;20(23):5866. doi: 10.3390/ijms20235866 (PMC6928728; doi:10.3390/ijms20235866)
Supplement: Supplementary file 1 [file ijms-20-05866-s001.pdf]

## SUPPLEMENTARY MATERIALS

### Supplementary Figure 1

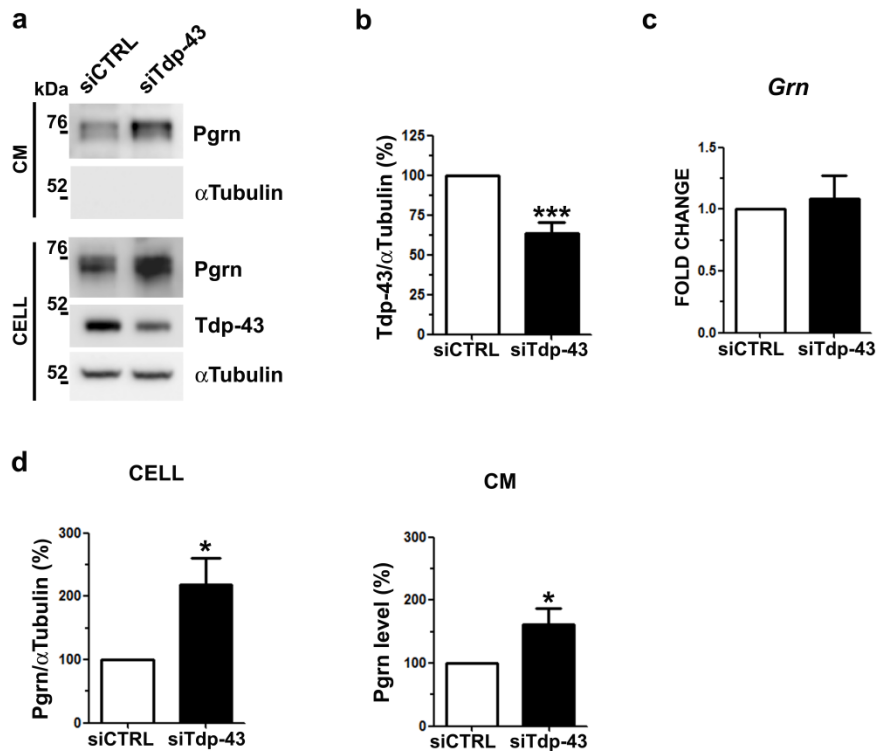

#### Analysis of intracellular and secreted Pgrn levels upon Tdp-43 LOF in murine neuroblastoma N2a cells.

**a)** Representative WB images of Pgrn levels in cell lysates (CELL) and in conditioned media (CM) upon Tdp-43 depletion in murine N2a cells. Tdp-43 immunoblot was reported to show gene silencing efficiency,  $\alpha$ -Tubulin was used for data normalization and as negative control in conditioned media. **b)** Densitometric and statistical analyses of Tdp-43 protein levels shown in (a). **c)** Real time PCR of *Grn* gene expression upon Tdp-43 depletion. **d)** Densitometric and statistical analyses of intracellular (CELL) and secreted (CM) Pgrn levels in Tdp-43 depleted N2a cells shown in (a) (mean $\pm$ s.e.m.; n=4 independent experiments; Two-tailed Unpaired *t* test; \* *p*< 0.05, \*\*\* *p*<0.001).)

**Human and murine *GRN* 3'UTR sequence alignment and the putative TDP-43 binding region.**

### Supplementary Figure 3

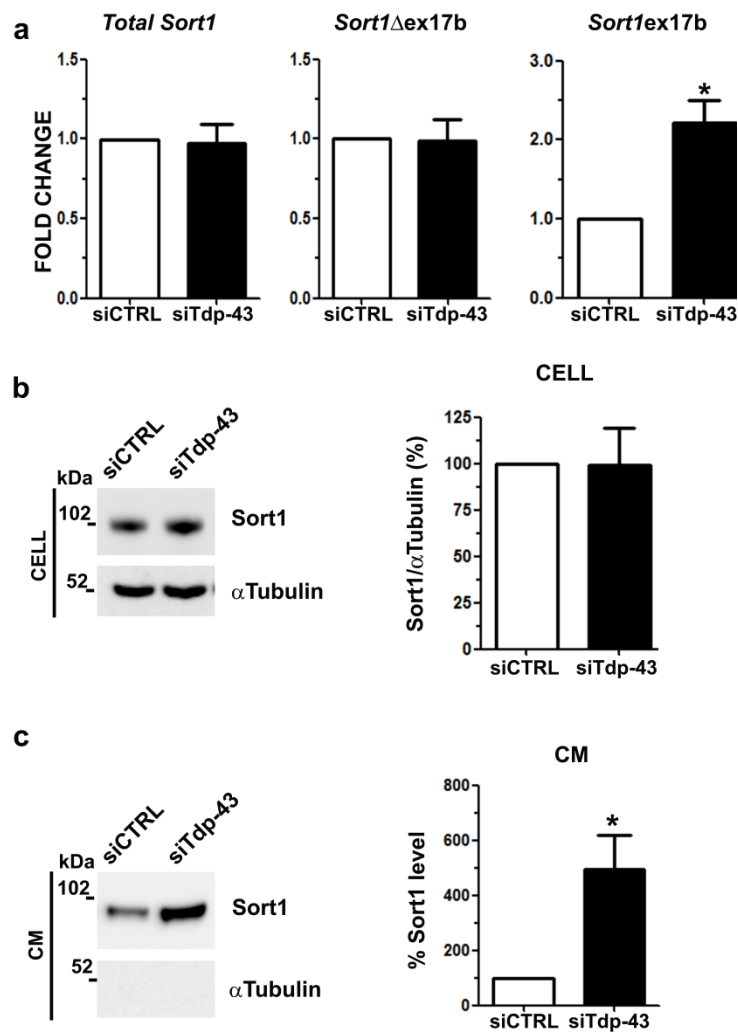

#### Sortilin1 splicing and protein levels upon Tdp-43 *LOF* in murine neuroblastoma N2a cells.

**a)** Real time PCR of total and splicing isoforms of *Sort1* in Tdp-43 knocked-down murine neuroblastoma N2a cells shown in Supplementary Figure 1. **b)** Representative WB images and densitometric analysis of total intracellular (CELL) Sort1 protein levels upon Tdp-43 knock-down in N2a cells.  $\alpha$ -Tubulin was used for data normalization. **c)** Representative WB and densitometry data of Sort1 levels in the conditioned media (CM) (mean $\pm$ s.e.m.; n=4 independent experiments; Two-tailed Unpaired *t* test; \* *p*< 0.05).

## Supplementary Figure 4

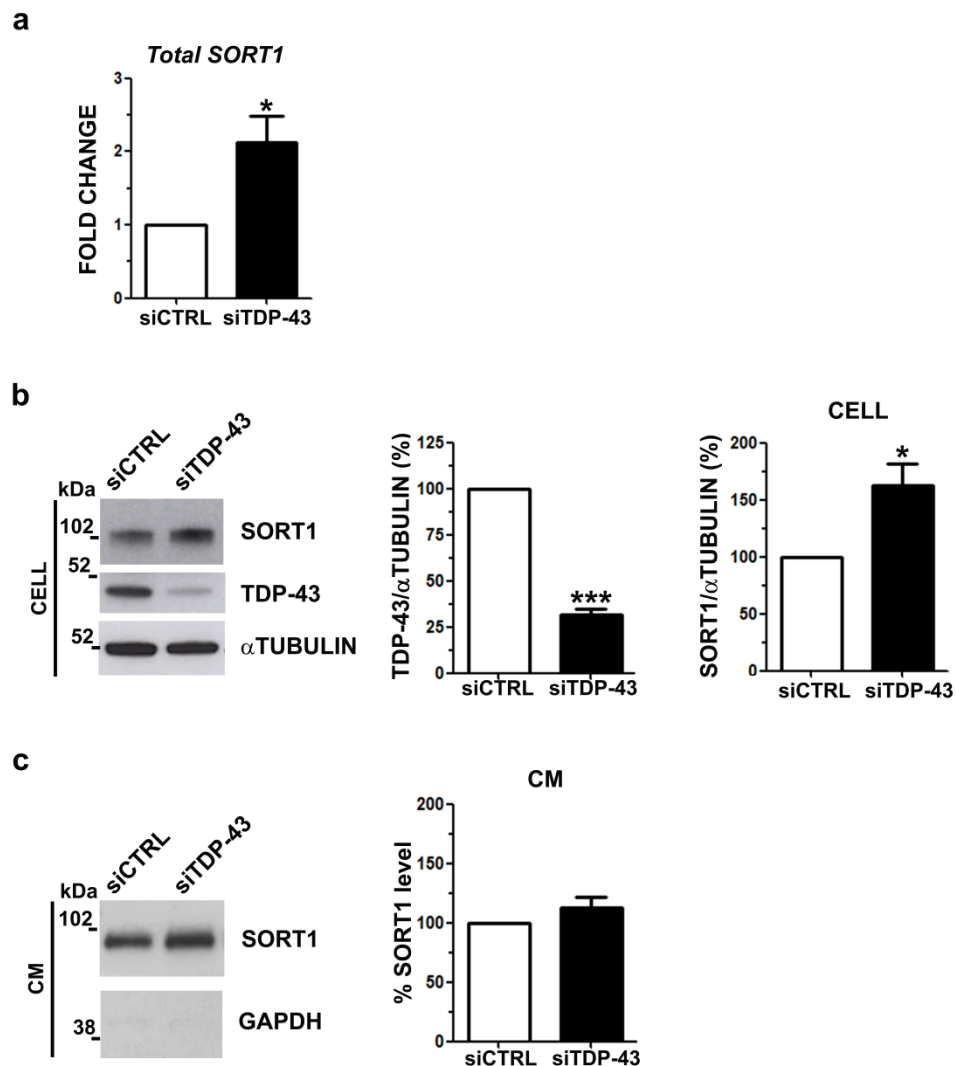

### Sortilin1 splicing and protein levels upon TDP-43 *LOF* in human neuroblastoma SK-N-BE cells.

**a)** Real time PCR of total *SORT1* in condition of TDP-43 gene silencing in human neuroblastoma SK-N-BE cells (mean±s.e.m.; n=4 independent experiments; Two-tailed Unaired *t* test; \* *p* < 0.05).

**b)** Representative WB images and densitometric analysis of total SORT1 protein levels upon TDP-43 knock-down in SK-N-BE cells. TDP-43 immunoblot was performed to assess gene silencing efficiency and α-Tubulin was used for data normalization (mean±s.e.m.; n=4 independent experiments; Two-tailed Unpaired *t* test; \* *p* < 0.05; \*\*\* *p* < 0.001).

**c)** Representative WB and densitometry data of SORT1 levels in the conditioned media (CM). GAPDH immunoblot was performed as negative control(mean±s.e.m.; n=3 independent experiments; Two-tailed Unpaired *t* test).

**Supplementary Table S1. List of the primary antibodies used for immunofluorescence (IF) and Western blot (WB) assays.**

| Antibody                 | Source                  | Assay |
|--------------------------|-------------------------|-------|
| GFP (1:2000)             | Roche_11814460001       | IF/WB |
| PGRN (mouse) (1:1000)    | R&D Systems_AF2557      | WB    |
| PGRN (human) (1:300)     | Invitrogen_40-3400      | WB    |
| TDP-43 (1:1000)          | Protein Tech_10782-2-AP | WB    |
| SORT1 (1:300)            | R&D Systems_MAB3154     | WB    |
| $\alpha$ Tubulin (1:500) | Sigma-Adrich_T6199      | WB    |
| POLDIP3 (1:500)          | Cell Signaling_5439     | WB    |
| FLAG (1:1000)            | F3165 (Sigma-Aldrich)   | IP    |
| goat anti-mouse IgG      | sc-2025 (Santa Cruz)    | IP    |

**Supplementary Table S2. List of primers sequences used for real time PCR.**

| Gene                                        | Foward primer            | Reverse primer            | Ref  |
|---------------------------------------------|--------------------------|---------------------------|------|
| <i>murine GRN</i>                           | CCAACACAGCTGCTGTAAC      | CTCGTTATTCTAGGCCATGTG     | [7]  |
| <i>murine SORT1 (Total)</i>                 | CGTGTTCCCTGGAGGACTTCCT   | TTCAGGCTGCTCCACGCACT      | [21] |
| <i>murine SORT1ex17b</i>                    | AAATCCCAGGAGACAAATGC     | GAGCTGGATTCTGGGACAAG      | [21] |
| <i>murine SORT1<math>\Delta</math>ex17b</i> | CCCCACAAAGCAGAATTCCAAGTC | TGACAAGCATCAGTCCCACGAT    | [21] |
| <i>murine RPL10a</i>                        | GAAGAAGGTGCTGTGTCTGGC    | TCGGTCATCTTCACGTGGC       | [7]  |
| <i>human GRN</i>                            | CAGCTACAGCTGCTGCCGTC     | CTCAGTGTTGTGGGCCATTTG     | -    |
| <i>human SORT1 (Total)</i>                  | GGCCTGTGGGTGTCCAAGAA     | GCAGGAGCCATTTGCATAGGTT    | [21] |
| <i>human SORT1ex17b</i>                     | AATCCAGCTCTGCCTCCTCT     | TCCCACGATGGCCAGGATAA      | [21] |
| <i>human SORT1<math>\Delta</math>ex17b</i>  | TGGGGTAAATCCAGTTCGAG     | GACTTGGAATTCTGTTTTTCCGGAC | [21] |
| <i>human RPL10a</i>                         | GAAGAAGGTGTTATGTCTGG     | TCTGTCATCTTCACGTGAC       | [20] |
